# Supplementary material for: Proteasome inhibition and oxidative reactions disrupt cellular homeostasis during heme stress
Source: PubMed Central journal article supplement — Cell Death Differ. 2014 Oct 10;22(4):597–611. doi: 10.1038/cdd.2014.154 (PMC4356336; doi:10.1038/cdd.2014.154), 2014-10-10
Supplement: cdd2014154x1.pdf [file cdd2014154x1.pdf]

Supplementary Figure 2

candidate proteins, abs ratio(Mean) >0.5, p < 0.05

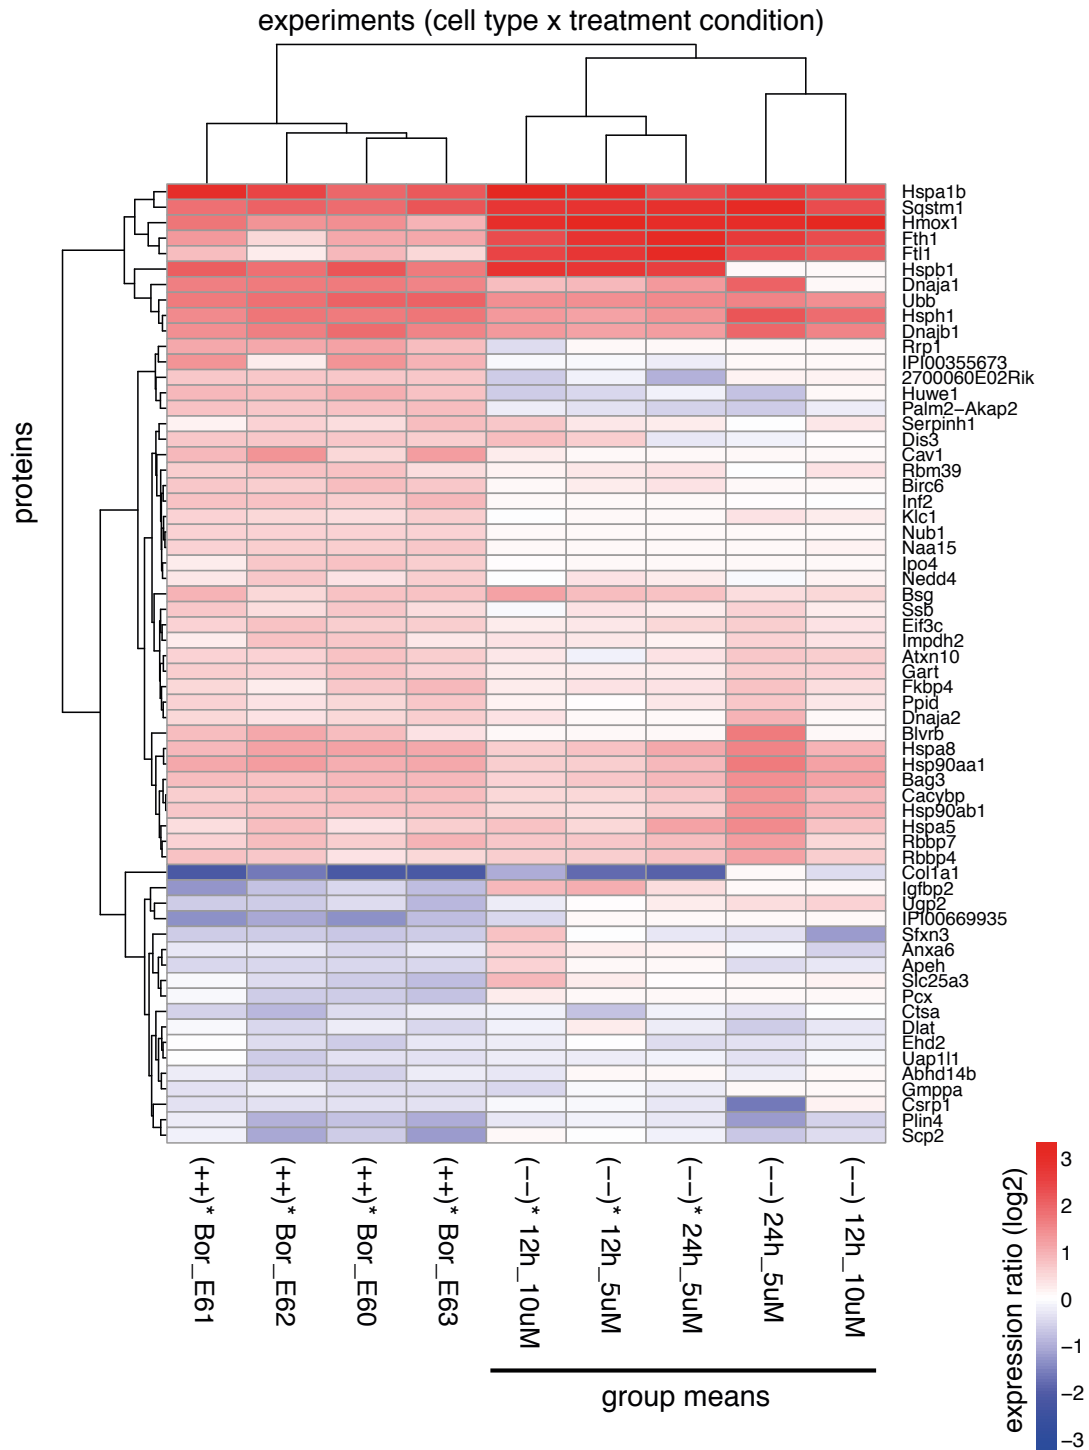

**Supplementary Figure 2**

Hierarchical clustering analysis of all proteins that have been identified as differentially expressed in heme treated Hmox1 (-/-) cells and bortezomib (10 pM) treated Hmox1 (+/+) MEF cells, respectively. The heme response data include all data from heme treated Hmox1 (-/-) MEF cells shown in Figure 2 that were included into this analysis as the five condition group means. The bortezomib data represent data from 4 independent SILAC experiments. The plot includes all proteins with an absolute expression ratio of > 0.5 (log<sub>2</sub>) in treated compared to matched untreated control cells (p < 0.05). red: protein expression higher in treated cells, blue: protein expression lower in treated cells.

Supplementary Figure 3

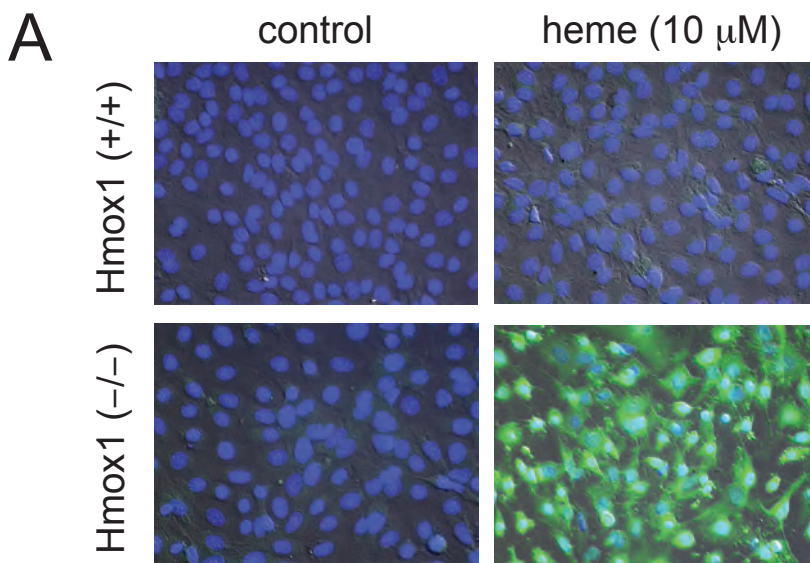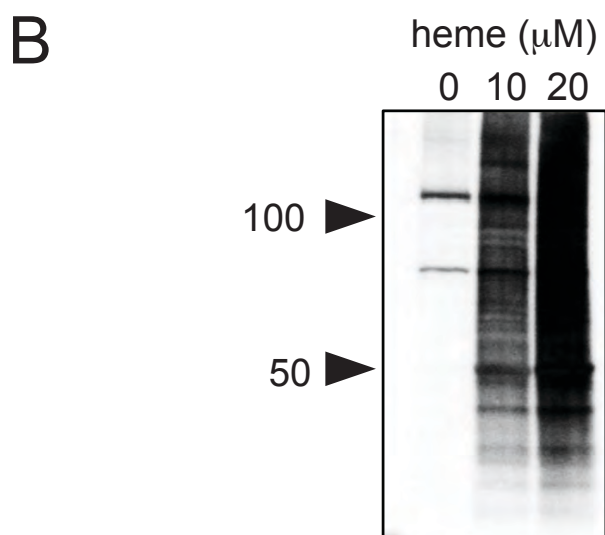

**Supplementary Figure 3: Heme triggers accumulation of lipid peroxide modified proteins**  
**(A)** Hmox1 (-/-) and Hmox1 (+/+) MEF were incubated in serum free DMEM with 10  $\mu$ M linoleamide alkyne in the absence (control) or presence of heme (10  $\mu$ M) for 6 h. Protein adducts with linoleamide oxidation products (green) were then detected by fluorescence microscopy after reaction with Alexa-488 azide. Images were acquired using a Zeiss AxioScope microscope at an original magnification of 200  $\times$  (blue: nuclei/DAPI). **(B)** Formation of cellular protein-lipid-adducts in heme-treated Hmox1 (-/-) MEF detected by click-chemistry facilitated biotinylation of cell lysates and subsequent SDS-PAGE with Western blot detection by HRP streptavidin.

Supplementary Figure 4

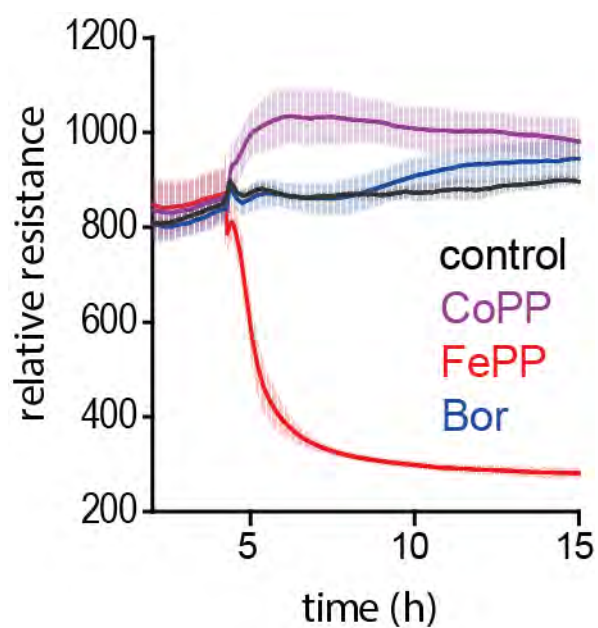

**Supplementary Figure 4: Toxicity of heme, CoPP and bortezomib**

Monolayer integrity of confluent Hmox1 (-/-) MEF was analyzed with an ECIS<sup>®</sup> instrument as a measure of cytotoxicity over time during incubation with FePP (10  $\mu$ M), CoPP (10  $\mu$ M) or bortezomib (100 pM). The declining relative electrical resistance in the cultures treated with FePP indicates cell damage, which did not occur during incubation with CoPP and bortezomib (data indicate mean  $\pm$  SD of four biologic replicates).
